# Supplementary material for: Non-covalent marriage of β-cyclodextrin-polyethylene glycol and functional polyacrylamide via host–guest interaction: construction, characterization and performances
Source: Royal Society of Chemistry journal article supplement (doi:10.1039/c6ra07102c), 2016-01-01
Supplement: c6ra07102c1.pdf [file c6ra07102c1.pdf]

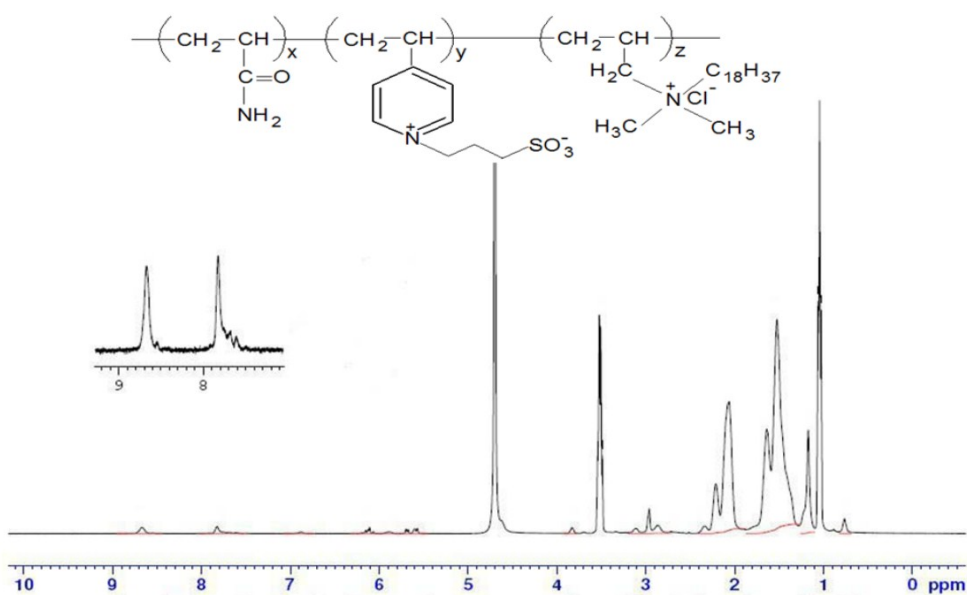

SI Figure. 1 <sup>1</sup>H NMR spectra of P(AM/VPPS/C<sub>18</sub>DMAAC)

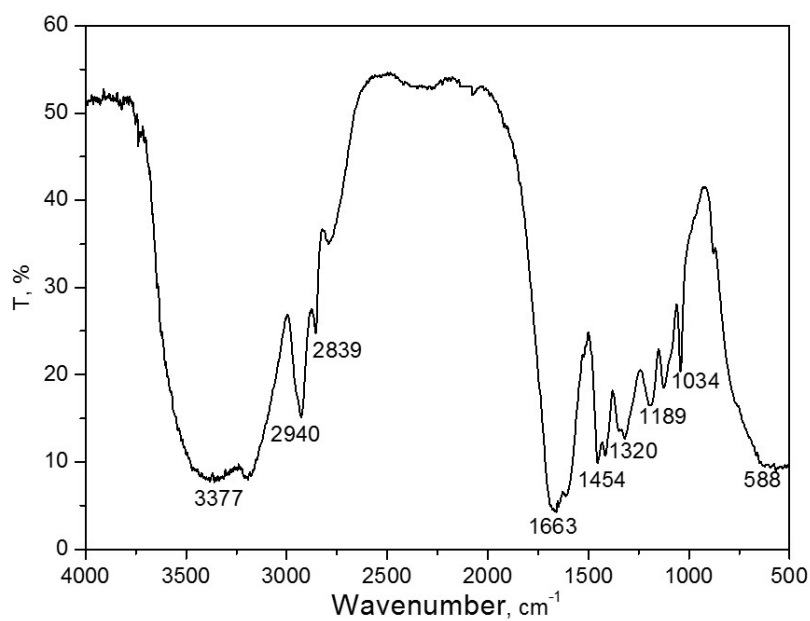

SI Figure. 2 FT-IR spectra of P(AM/VPPS/C<sub>18</sub>DMAAC)

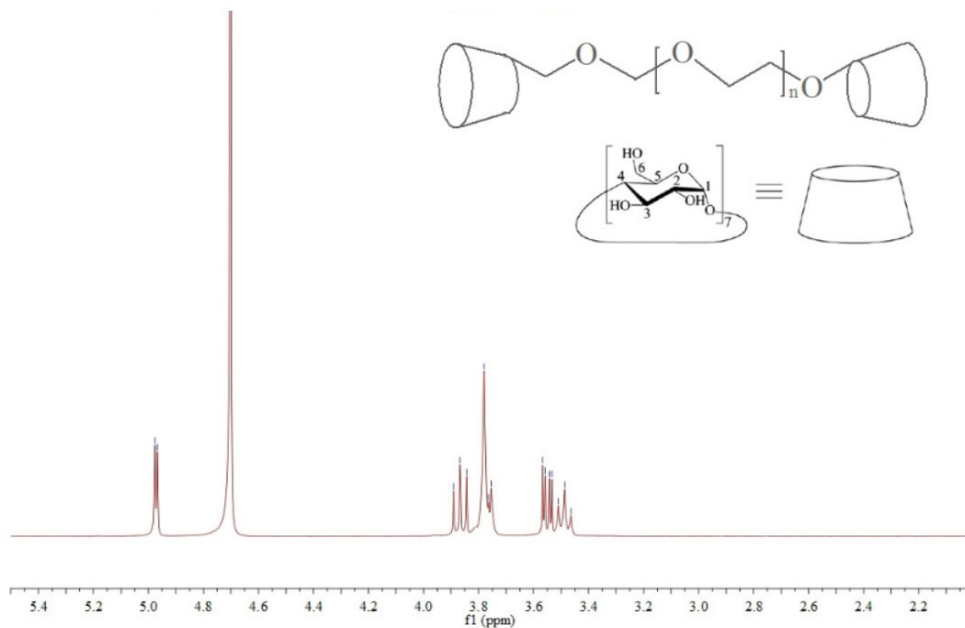

SI Figure. 3  $^1\text{H}$  NMR spectra of  $\beta$ -CD-PEG

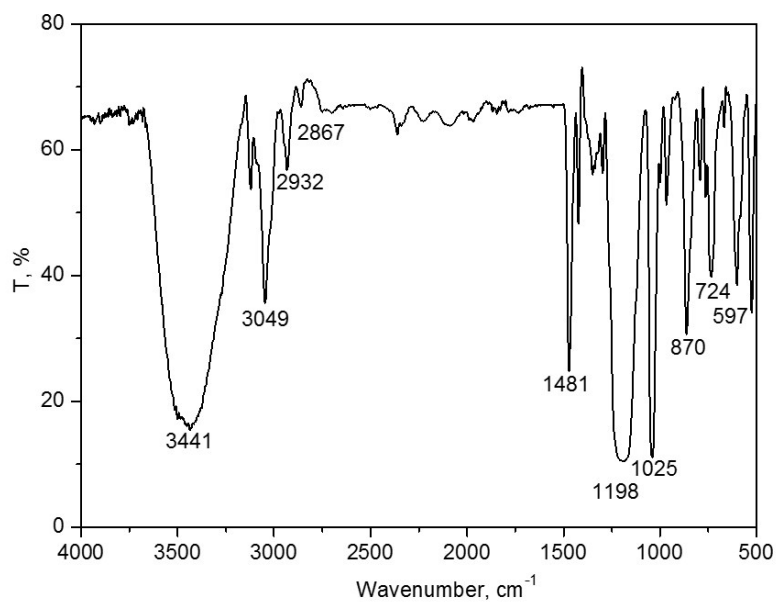

SI Figure. 4 FT-IR spectra of  $\beta$ -CD-PEG
