# Supplementary material for: Non-covalent marriage of β-cyclodextrin-polyethylene glycol and functional polyacrylamide via host–guest interaction: construction, characterization and performances
Source: Royal Society of Chemistry journal article supplement (doi:10.1039/c6ra07102c), 2016-01-01
Supplement: c6ra07102c2.pdf [file c6ra07102c2.pdf]

### Synthesis of $\beta$ -cyclodextrin-polyethylene glycol ( $\beta$ -CD-PEG)

Thionyl chloride (8.72 mL) was slowly dropped into the PEG400 (21.5 mL) at room temperature for 5 h, followed by addition of  $\beta$ -CD (68.1 g) which has already been dissolved in an aqueous solution of NaOH at the thermostat (333.15 K) with a magnetic stirrer to mix approximately. After 7 h, the synthesis was stopped and the solution was neutralized to pH 7 by the HCl solution. The polymer was washed and extracted with ethanol to remove water, residual monomers, and initiator. Then, the bridged  $\beta$ -CD-PEG was further dried under vacuum oven at 333.15 K for 48 h.

Table Molecular weight measured by Asymmetric Field Flow Fractionation (AFFF)/ Light Scattering (LS) and hydrodynamic diameter measured by Dynamic Light Scattering (DLS) for polymers

| Polymer                          | Mn /gmol <sup>-1</sup> | hydrodynamic diam/nm |
|----------------------------------|------------------------|----------------------|
| $\beta$ -CD-PEG                  | 3206                   | --                   |
| P(AM/VPPS/C <sub>18</sub> DMAAC) | 2.74*10 <sup>6</sup>   | 5.57                 |
| Polymer/Bis-CD(ppm)              | 4.25*10 <sup>6</sup>   | 8.83                 |
